# Supplementary material for: Male‐Biased Gut Microbiome and Metabolites Aggravate Colorectal Cancer Development
Source: PubMed Central journal article supplement (PMC10477899; doi:10.1002/advs.202206238), 2023-07-03
Supplement: ADVS-10-2206238-s001.pdf [file ADVS-10-2206238-s001.pdf]

## Supporting Information

for *Adv. Sci.*, DOI 10.1002/adv.202206238

Male-Biased Gut Microbiome and Metabolites Aggravate Colorectal Cancer Development

*Ling Wang, Yi-Xuan Tu, Lu Chen, Yuan Zhang, Xue-Ling Pan, Shu-Qiao Yang, Shuai-Jie Zhang, Sheng-Hui Li, Ke-Chun Yu, Shuo Song, Hong-Li Xu, Zhu-Cheng Yin, Jun-Qiu Yue, Qian-Lin Ni, Tang Tang, Jiu-Liang Zhang, Min Guo, Shuai Zhang, Fan Yao, Xin-Jun Liang\* and Zhen-Xia Chen\**

## Supplementary Figures

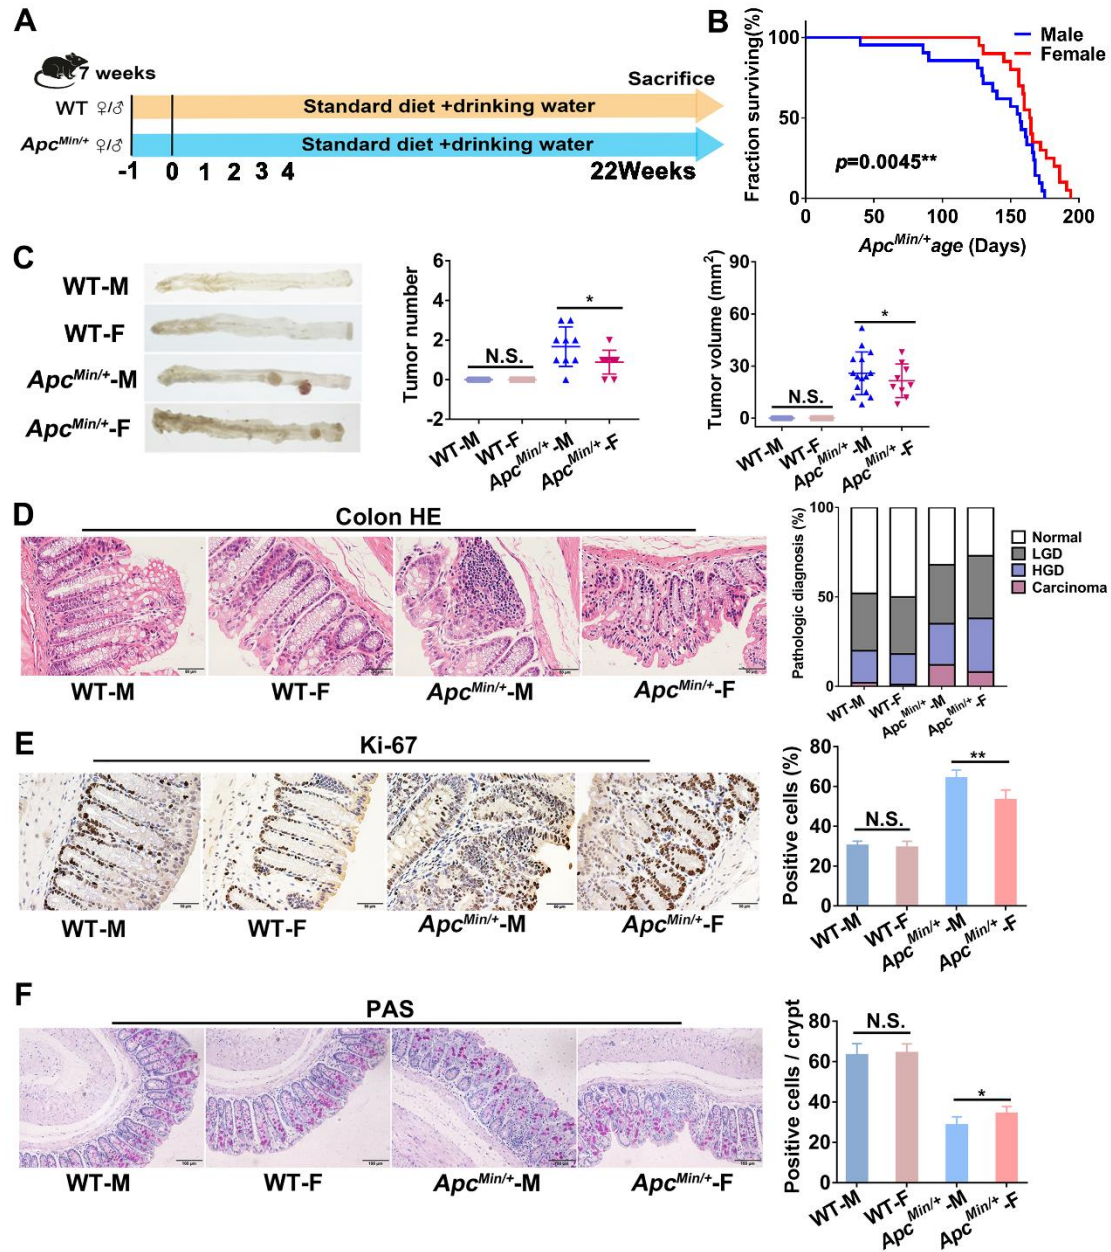

**Supplementary Figure 1. Sexual dimorphisms in the tumorigenesis of *Apc*<sup>Min/+</sup> mouse model with standard diet.** (A) Experimental design for an *Apc*<sup>Min/+</sup> CRC mouse model and WT mice with standard diet (n=20/each group). (B) Female had increased survival compared with male mice. (C) Representative image of colon at sacrifice. Tumor number and tumor volume in WT-male (WT-M), WT-female (WT-F), *Apc*<sup>Min/+</sup>-male (*Apc*<sup>Min/+</sup>-M), *Apc*<sup>Min/+</sup>-female (*Apc*<sup>Min/+</sup>-F) mice (n=9/each group). (D) HE staining for pathologic diagnosis of mice colons. Quantitative analysis of pathologic score was calculated according to the following criteria: 0, normal; 1, LGD;

2, HGD; and 3, carcinoma. (E) IHC staining for Ki-67 of mice colons with quantitative analysis of Ki-67 index. (F) The number of colon goblet cells was evaluated by PAS staining. The number of Paneth cells was evaluated by Lysozyme immunohistochemical staining. Six tissues were randomly selected from each section to calculate the percentage of positive cells per crypt. Data are expressed as mean  $\pm$  SD. \*  $p < .05$ , \*\*  $p < .01$ , N.S. no significant.

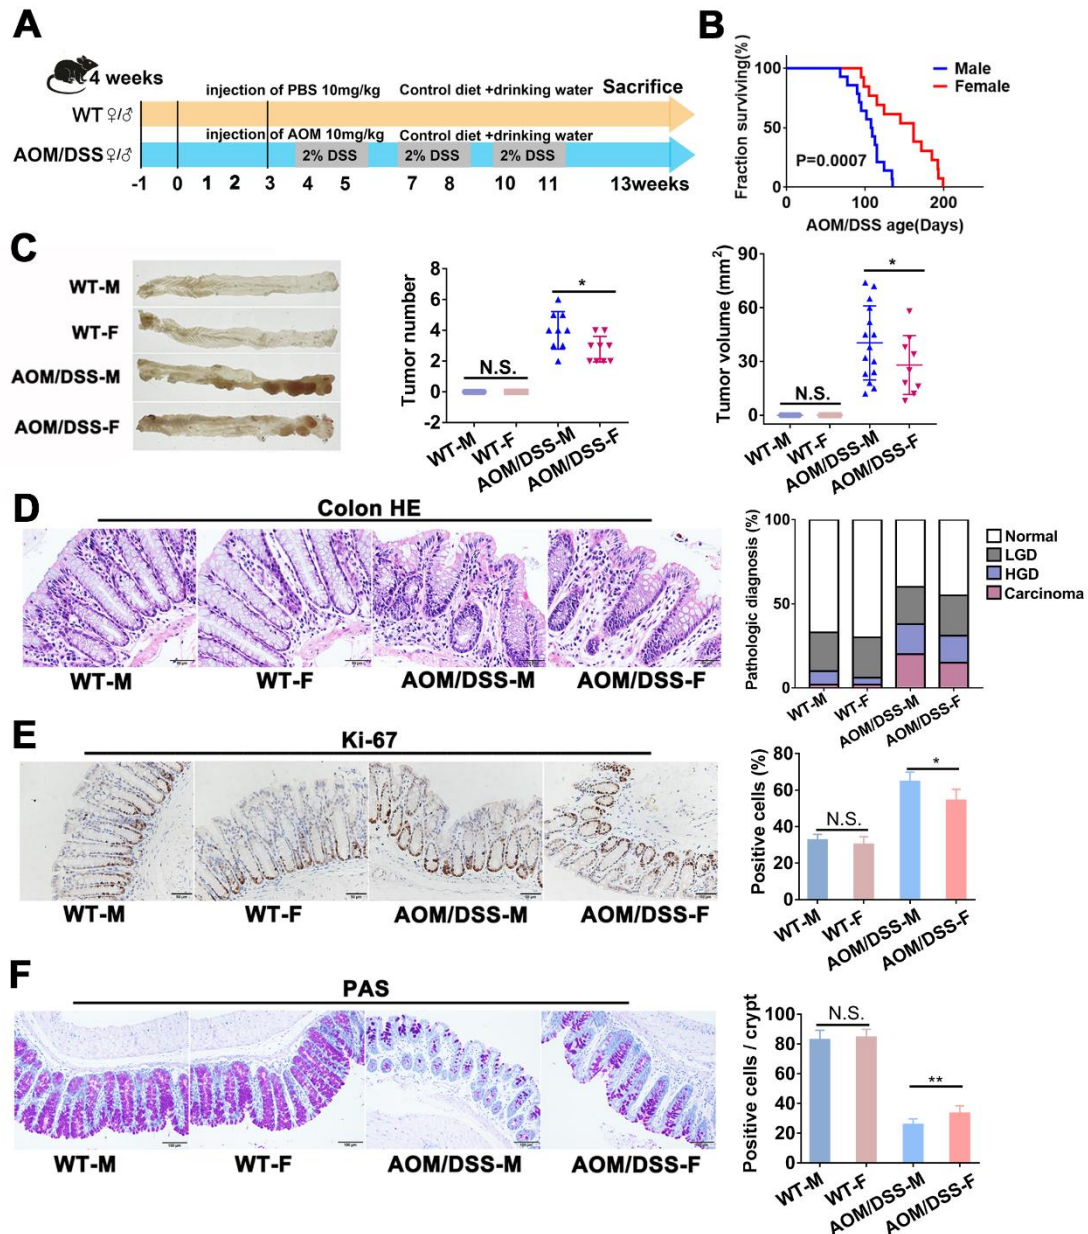

**Supplementary Figure 2. Sexual dimorphisms in the tumorigenesis of AOM/DSS-treated mouse model.** (A) Experimental design for an AOM/DSS-treated CRC mouse model and WT mice with standard diet (n=20/each group). (B) Female had increased survival compared with male mice. (C) Representative image of colon

at sacrifice. Tumor number and tumor volume in WT-male (WT-M), WT-female (WT-F), AOM/DSS-male (AOM/DSS-M), AOM/DSS-female (AOM/DSS-F) mice (n=20/each group). (D) HE staining for pathologic diagnosis of mice colons. Quantitative analysis of pathologic score was calculated according to the following criteria: 0, normal; 1, LGD; 2, HGD; and 3, carcinoma. (E) IHC staining for Ki-67 of mice colons with quantitative analysis of Ki-67 index in WT-M, WT-F, AOM/DSS-M, AOM/DSS-F mice. (F) The number of colon goblet cells was evaluated by PAS staining in WT-M, WT-F, AOM/DSS-M, AOM/DSS-F mice. Data are expressed as mean  $\pm$  SD. \*  $p < .05$ , \*\*  $p < .01$ , N.S. no significant.

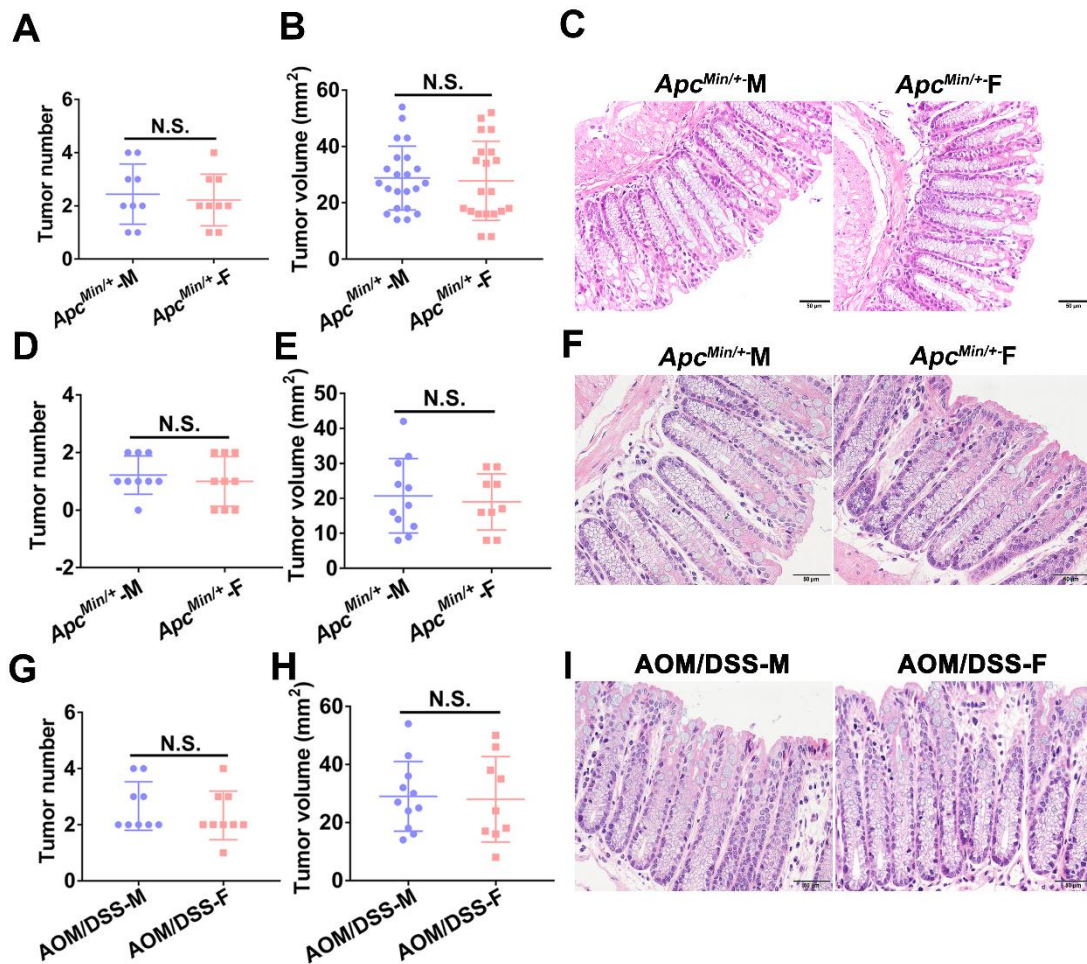

**Supplementary Figure 3. Sex-biased gut microbiome contributes to sexual dimorphism in CRC development of mice.** (A-B) Tumor number and tumor volume in male or female *Apc<sup>Min/+</sup>* mice with standard diet after antibiotic treatment (n=9/each group). (C) HE staining for pathologic diagnosis of mice colons in male or female *Apc<sup>Min/+</sup>* mice with standard diet after antibiotic treatment. (D-E) Tumor number and



tumor volume in male or female  $Apc^{Min/+}$  mice with high-fat diet male or female  $Apc^{Min/+}$  mice after antibiotic treatment. (F) HE staining for pathologic diagnosis of mice colons in male or female  $Apc^{Min/+}$  mice with high-fat diet after antibiotic treatment. (G-H) Tumor number and tumor volume in male or female AOM/DSS-treated mice with standard diet. (I) HE staining for pathologic diagnosis of mice colons in male or female AOM/DSS mice after antibiotic treatment. Data are expressed as mean  $\pm$  SD. N.S. no significant.

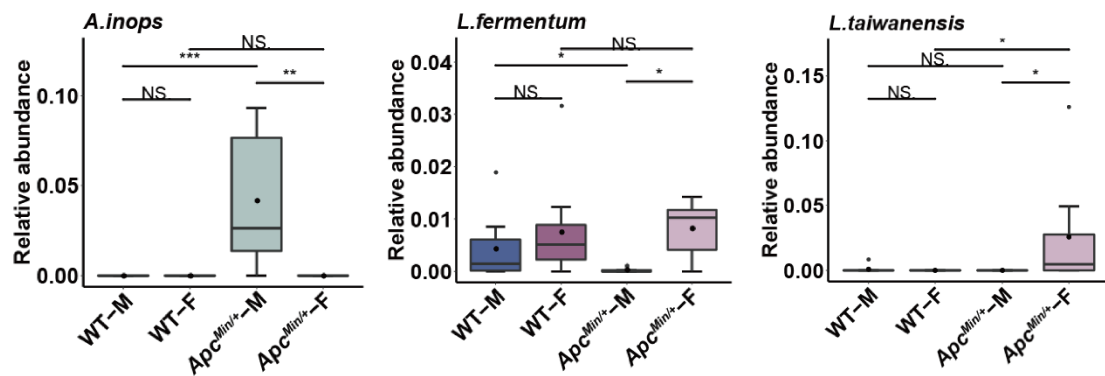

**Supplementary Figure 4 (C)** The abundance of *Lactobacillus taiwanensis*, *Lactobacillus fermentum* and *Alistipes inops* in WT-M, WT-F,  $Apc^{Min/+}$ -M,  $Apc^{Min/+}$ -F mice. Data are expressed as mean  $\pm$  SD. \*  $p < .05$ , \*\*  $p < .01$ . N.S. no significant.

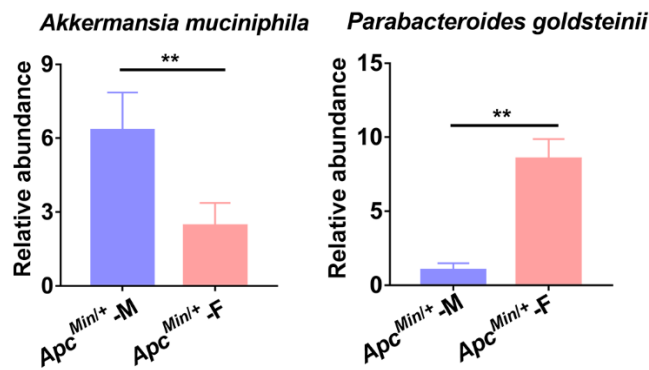

**Supplementary Figure 5** The Relative abundance of *Akkermansia muciniphila* and *Parabacteroides goldsteinii* in  $Apc^{Min/+}$ -M and  $Apc^{Min/+}$ -F mice. Data are expressed as mean  $\pm$  SD. \*  $p < .05$ , \*\*  $p < .01$ .

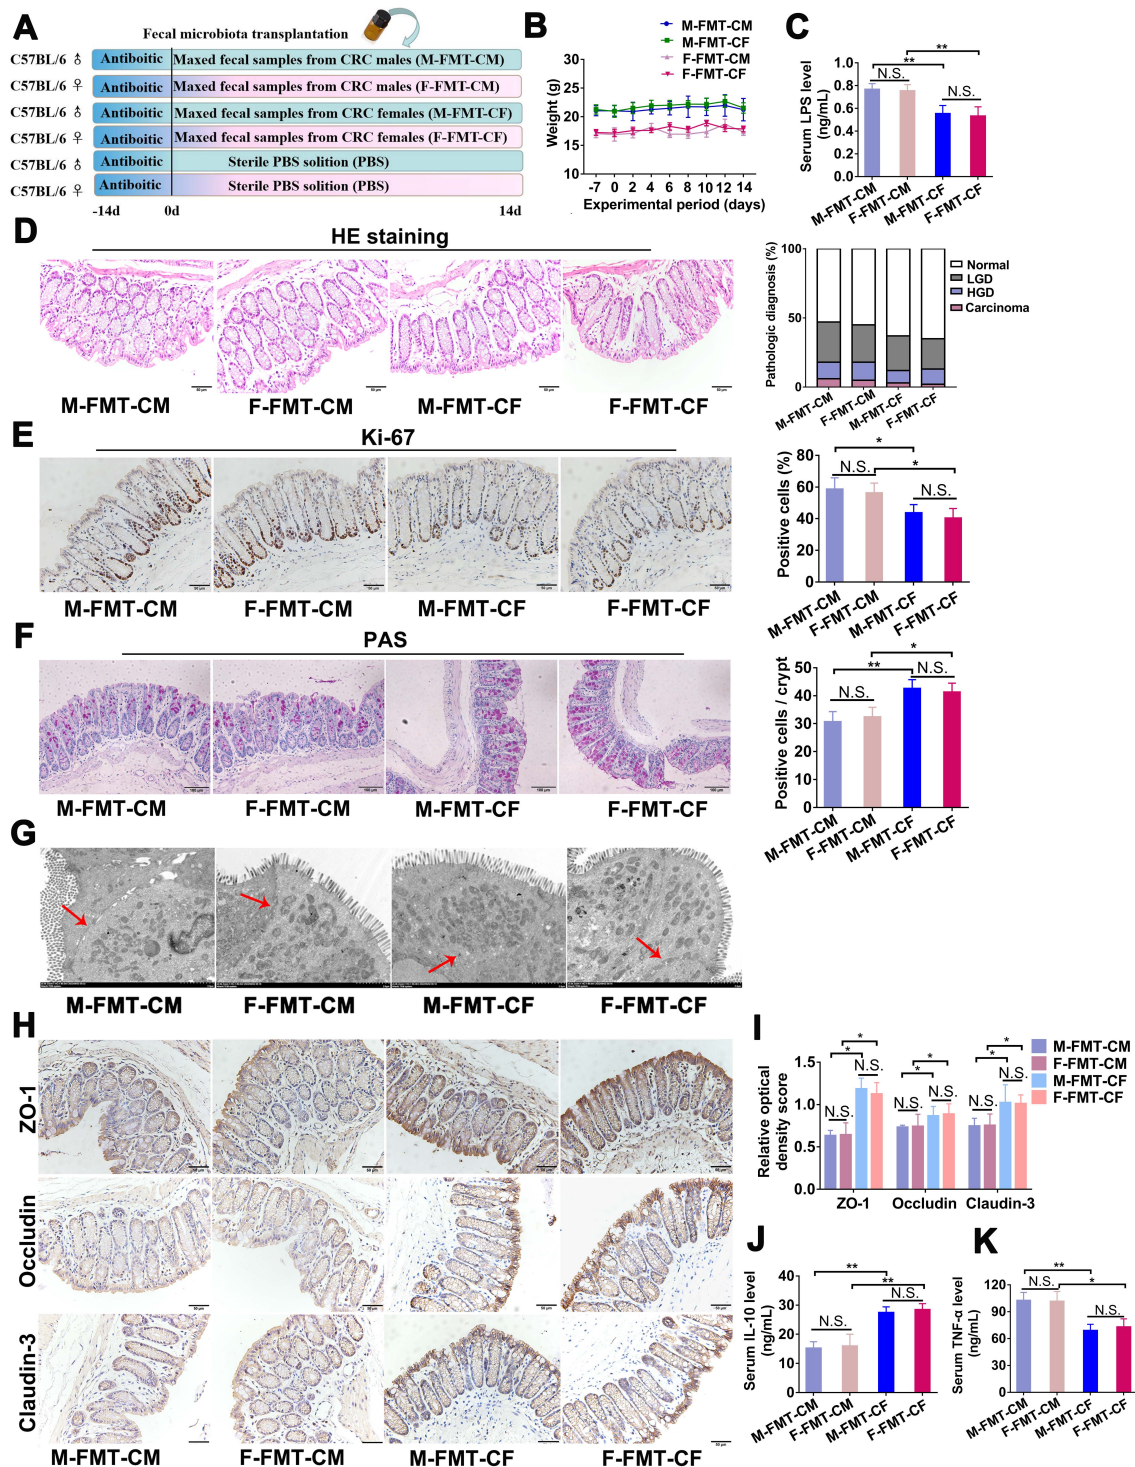

**Supplementary Figure 6. Gut microbes from male CRC patients contribute to more severe colorectal tumorigenesis in recipient pseudo germ-free mice.** (A) Experimental design for fecal microbiota transplantation for pseudo germ-free mice (n=15/each group). (B) Body weight of each group was recorded daily. (C) LPS concentration in serum of M-FMT-CM (male mice received feces from male patients), received feces from female patients), and F-FMT-CF (female mice received feces

from female patients) mice (n=9/each group). (D) HE staining for pathologic diagnosis of mice colons. Quantitative analysis of pathologic score was calculated according to the following criteria: 0, normal; 1, LGD; 2, HGD; and 3, carcinoma. (E) IHC staining of Ki-67 and quantitative analysis of Ki-67 index of colon section of pseudo germ-free mice. (F) The number of colon goblet cells was evaluated by PAS staining. The number of Paneth cells was evaluated by Lysozyme immunohistochemical staining. Six tissues were randomly selected from each section to calculate the percentage of positive cells per crypt. (G) Representative images of intercellular junctions of M-FMT-CM, F-FMT-CM, M-FMT-CF, and F-FMT-CF mice by transmission electron microscope. (H) IHC for distribution of the adhesion molecule ZO-1, Occludin and Claudin-3 with quantitative analysis in colon tissues of M-FMT-CM, F-FMT-CM, M-FMT-CF, and F-FMT-CF mice. (I) IL-10 concentration in serum of pseudo germ-free mice. (J) TNF- $\alpha$  concentration in serum of pseudo germ-free mice. Data are expressed as mean  $\pm$  SD. \*  $p < .05$ , \*\*  $p < .01$ , N.S. no significant.

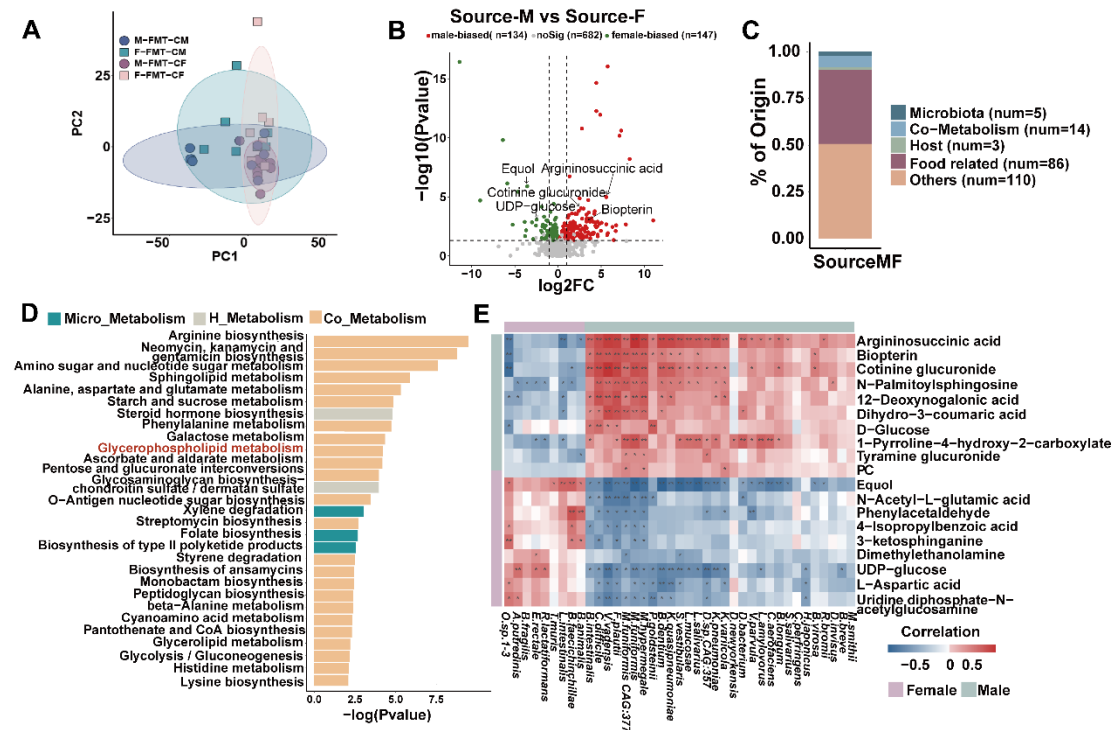

**Supplementary Figure 7. Male-biased gut metabolites aggravated colorectal tumorigenesis through the glycerophospholipid metabolism pathway. (A)** PCA plot for gut metabolomics analysis of M-FMT-CM (n=10), F-FMT-CM (n=10),

M-FMT-CF (n=9), and F-FMT-CF (n=9) mice. (B) Volcano plot for differential metabolites in comparison between source-M (mice received feces from male patients) and source-F (mice received feces from female patients) mice. (C) The source of differential metabolites among selected candidates. (D) Pathway analysis of differentially enriched metabolites among FMT-CM and FMT-CF mice. (E) Correlation analysis of the association of the sex-biased microbes and metabolites between FMT-CM and FMT-CF mice. Data are expressed as mean  $\pm$  SD. \*  $p < .05$ , \*\*  $p < .01$ , \*\*\*  $p < .001$ , N.S. no significant. Dot plot reflects data points from independent experiment.

**Table S1. Clinical information of the human donors for stool gavage to mice.**

| ID | Sex    | Age | BMI (kg/m <sup>2</sup> ) | Weight (kg) | Height (cm) | TNM stage    | Site of tumor                      | Smoking | Drinking |
|----|--------|-----|--------------------------|-------------|-------------|--------------|------------------------------------|---------|----------|
| 1  | female | 40  | 19.93                    | 48.5        | 156         | T3pN1M1; IV  | sigmoid colon; liver               | No      | No       |
| 2  | female | 42  | 24.84                    | 62          | 158         | T3N1M0; IIIb | rectum                             | No      | No       |
| 3  | female | 51  | 25.71                    | 70          | 165         | T4N2M1; IV   | rectum; ovarian                    | No      | No       |
| 4  | female | 51  | 25.64                    | 64          | 158         | T3N+M1; IV   | sigmoid colon; liver               | No      | No       |
| 5  | female | 53  | 21.93                    | 52          | 154         | T4N1M1; IV   | ileum; cecum                       | No      | No       |
| 6  | female | 57  | 16.65                    | 40          | 155         | T3N0M1       | colon; liver                       | No      | No       |
| 7  | female | 57  | 16.44                    | 47.5        | 170         | TxNxM1; IV   | rectum                             | No      | No       |
| 8  | female | 57  | 30.00                    | 73          | 156         | T4N3M1; IV   | colon; liver                       | No      | No       |
| 9  | female | 59  | 23.01                    | 56          | 156         | T3N2M0; IIIB | colon                              | No      | No       |
| 10 | female | 67  | 15.63                    | 40          | 160         | T2N0M0       | rectum                             | No      | No       |
| 11 | female | 68  | 16.65                    | 40          | 155         | T3N0M1       | colon; liver metastases            | No      | No       |
| 12 | female | 69  | 21.08                    | 50          | 154         | T4bN0M1      | rectum; liver metastases           | No      | No       |
| 13 | female | 71  | 26.84                    | 62          | 152         | T3N2M1; IV   | rectum                             | No      | No       |
| 14 | male   | 31  | 19.94                    | 59          | 172         | T3N2M1       | rectum; lung; liver                | No      | No       |
| 15 | male   | 37  | 21.26                    | 60          | 168         | T4N1M1; IV   | colon; pelvic metastasis           | No      | No       |
| 16 | male   | 40  | 25.06                    | 75          | 173         | T3N0M0       | right colon                        | No      | No       |
| 17 | male   | 45  | 22.86                    | 70          | 175         | TxNxM1       | colon; liver                       | Yes     | Yes      |
| 18 | male   | 54  | 22.86                    | 70          | 175         | T3N2M1; IV   | Left colon; liver metastasis       | No      | No       |
| 19 | male   | 56  | 22.22                    | 72          | 180         | T4aN0M1      | colon; lung; peritoneum metastasis | No      | Yes      |
| 20 | male   | 57  | 23.39                    | 70          | 173         | T3N0M1       | rectum; liver                      | No      | No       |
| 21 | male   | 57  | 23.39                    | 70          | 173         | TxN+M1; IV   | colon; liver                       | No      | No       |
| 22 | male   | 61  | 17.63                    | 44          | 158         | T3N1M1       | colon; liver metastases            | No      | No       |
| 23 | male   | 63  | 20.05                    | 60          | 173         | T3-4N+M1; IV | sigmoid; pelvic metastasis         | No      | No       |
| 24 | male   | 63  | 20.07                    | 58          | 170         | IV           | rectum; lung; liver                | No      | No       |



|    |      |    |       |    |     |              |                                  |     |     |
|----|------|----|-------|----|-----|--------------|----------------------------------|-----|-----|
|    |      |    |       |    |     |              | metastasis                       |     |     |
| 25 | male | 63 | 18.42 | 52 | 168 | T4N+M1; IV   | colon; liver                     | Yes | Yes |
| 26 | male | 64 | 23.66 | 70 | 172 | T3N+M1       | colon; liver                     | No  | Yes |
| 27 | male | 64 | 27.68 | 70 | 170 | V            | colon; lung; liver<br>metastasis | No  | No  |
| 28 | male | 72 | 20.44 | 57 | 167 | T3N1M0; IIIb | colon                            | No  | No  |
| 29 | male | 83 | 18.34 | 53 | 170 | T3N1M1       | rectum; liver metastases         | No  | No  |

**Table S2. The differential microbes of *Apc*<sup>Min/+</sup> (male vs female)**

| Microbiome                                 | pvalue | Log2FC       |
|--------------------------------------------|--------|--------------|
| <i>Dubosiella newyorkensis</i>             | 0      | -Inf         |
| <i>Flavonifractor plautii</i>              | 0.032  | -Inf         |
| <i>Clostridium symbiosum</i>               | 0.032  | -Inf         |
| <i>Eubacterium sp 14 2</i>                 | 0.032  | -Inf         |
| <i>Clostridium methylpentosum</i>          | 0.001  | -Inf         |
| <i>Lactobacillus taiwanensis</i>           | 0.032  | -Inf         |
| <i>Collinsella massiliensis</i>            | 0.032  | -Inf         |
| <i>Leuconostoc lactis</i>                  | 0.032  | -Inf         |
| <i>Parabacteroides goldsteinii</i>         | 0.001  | -12.87165254 |
| <i>Lactobacillus fermentum</i>             | 0.016  | -4.952644191 |
| <i>Anaerotruncus colihominis</i>           | 0.002  | -4.12655516  |
| <i>Akkermansia muciniphila</i>             | 0.007  | 1.567886902  |
| <i>Clostridium sp ASF502</i>               | 0.021  | 2.314882235  |
| <i>Romboutsia ilealis</i>                  | 0.038  | 2.645755528  |
| <i>Firmicutes bacterium ASF500</i>         | 0.01   | 2.851567805  |
| <i>Fretibacterium fastidiosum</i>          | 0.016  | 3.508204408  |
| <i>Lachnospiraceae bacterium 10 1</i>      | 0.01   | 4.141943708  |
| <i>Lactobacillus johnsonii</i>             | 0.001  | 7.572408754  |
| <i>Mucispirillum schaedleri</i>            | 0.001  | 11.34133967  |
| <i>Muribaculaceae bacterium DSM 103720</i> | 0.001  | Inf          |
| <i>Alistipes inops</i>                     | 0.001  | Inf          |

**Table S3. The differential metabolites from microbes of *Apc*<sup>Min/+</sup> (VIP >1 and FDR <0.05) (male vs female)**

| Metabolite                                                       | FDR         | Log2FC      |
|------------------------------------------------------------------|-------------|-------------|
| N-[(3a,5b,7b)-7-hydroxy-24-oxo-3-(sulfooxy)cholan-24-yl]-Glycine | 0.000933482 | 5.971234163 |
| Glycerophosphocholine                                            | 0.004117065 | 2.990826501 |
| LysoPC (16:0)                                                    | 0.000845617 | 2.876997937 |
| Aldosterone 18-glucuronide                                       | 0.004117065 | 2.600221558 |
| Dehydroisoandrosterone 3-glucuronide                             | 0.004478912 | 2.373800634 |
| PC (16:0/0:0)                                                    | 0.000231737 | 2.116785368 |

|                                          |             |              |
|------------------------------------------|-------------|--------------|
| Orotidine                                | 0.000518124 | 2.064338348  |
| Sulfolithocholylglycine                  | 0.002103339 | 1.858640585  |
| LysoPC (16:1(9Z))                        | 0.000116533 | 1.82191341   |
| Palmitoyl-L-carnitine                    | 0.000146522 | 1.348601216  |
| 1-Stearoylglycerophosphocholine          | 0.000499737 | 1.020231054  |
| N-Acetyl-D-glucosamine                   | 0.016484495 | 0.670791441  |
| Niacinamide                              | 0.006447321 | 0.664620051  |
| Pantothenic Acid                         | 0.004117065 | 0.621987083  |
| P-Tolualdehyde                           | 0.007242809 | 0.364306864  |
| Mesobilirubinogen                        | 0.049074888 | -0.725339033 |
| 6-(alpha-D-Glucosaminyl)-1D-myo-inositol | 0.037442729 | -0.790029277 |
| N-Methylglutamic acid                    | 0.008242076 | -0.797607619 |
| Alpha-Linolenic acid                     | 0.029284833 | -0.974523465 |
| Phenylacetaldehyde                       | 0.007242809 | -1.666048452 |
| 16b-Hydroxysterone                       | 0.011294409 | -1.857613225 |
| 4-Guanidinobutanoic acid                 | 0.014097154 | -2.062880835 |
| L-Arginine                               | 0.001101226 | -2.908212203 |

**Table S4. The differential metabolites (VIP >1 and P-value <0.05) between FMT-AM and FMT-AF**

| Metabolite                         | P-value  | FDR      | Log2FC    |
|------------------------------------|----------|----------|-----------|
| Oxoadipic acid                     | 2.38E-04 | 8.53E-04 | 4.17E+00  |
| Folinic acid                       | 4.49E-05 | 2.41E-04 | 4.09E+00  |
| Saccharopine                       | 7.32E-07 | 7.87E-06 | 3.59E+00  |
| Deoxycholic acid 3-glucuronide     | 5.50E-06 | 3.38E-05 | 3.32E+00  |
| DTMP                               | 3.43E-03 | 5.41E-03 | 2.87E+00  |
| Porphobilinogen                    | 1.29E-03 | 2.78E-03 | 2.72E+00  |
| Homocysteine                       | 2.94E-03 | 5.06E-03 | 2.26E+00  |
| Biliverdin                         | 7.04E-04 | 1.68E-03 | 1.96E+00  |
| 5-L-Glutamyl-L-alanine             | 6.76E-04 | 1.68E-03 | 1.84E+00  |
| 4-Hydroxycyclohexylcarboxylic acid | 1.53E-03 | 3.14E-03 | 1.09E+00  |
| Phenylacetylglutamine              | 6.79E-03 | 8.59E-03 | 9.05E-01  |
| Hippuric acid                      | 6.87E-04 | 1.68E-03 | 8.77E-01  |
| Chlorogenic Acid                   | 1.42E-02 | 1.59E-02 | 8.20E-01  |
| 4-Hydroxybenzaldehyde              | 8.17E-03 | 9.76E-03 | 6.21E-01  |
| N-Acetyl-L-glutamic acid           | 7.12E-03 | 8.74E-03 | 6.09E-01  |
| Cholic acid                        | 2.15E-02 | 2.26E-02 | 5.12E-01  |
| LysoPC(14:0/0:0)                   | 3.95E-02 | 3.95E-02 | 3.30E-01  |
| Mesobilirubinogen                  | 4.45E-03 | 6.38E-03 | 5.39E-02  |
| Dimethylethanolamine               | 2.30E-03 | 4.12E-03 | -1.91E-01 |
| 2-Hydroxyphenylacetic Acid         | 1.92E-03 | 3.60E-03 | -2.20E-01 |
| Cuminaldehyde                      | 1.43E-02 | 1.59E-02 | -2.34E-01 |
| Indole                             | 3.62E-04 | 1.11E-03 | -2.96E-01 |

|                                          |          |          |           |
|------------------------------------------|----------|----------|-----------|
| 5-(hydroxymethyl)-2-Furancarboxylic acid | 1.35E-04 | 5.79E-04 | -3.18E-01 |
| P-Tolualdehyde                           | 1.83E-04 | 7.13E-04 | -3.60E-01 |
| N-Acetyl-L-glutamate 5-semialdehyde      | 5.94E-03 | 8.21E-03 | -4.89E-01 |
| Androstenedione                          | 6.11E-03 | 8.21E-03 | -5.71E-01 |
| 3-ketosphinganine                        | 3.16E-03 | 5.22E-03 | -5.93E-01 |
| PC(16:0/0:0)                             | 3.93E-06 | 2.82E-05 | -6.01E-01 |
| LysoPC(16:0)                             | 7.94E-09 | 1.71E-07 | -7.89E-01 |
| N-Acetylneuraminic acid                  | 3.65E-03 | 5.41E-03 | -8.65E-01 |
| Dopaquinone                              | 1.44E-02 | 1.59E-02 | -8.70E-01 |
| 5-Hydroxyindoleacetaldehyde              | 3.02E-02 | 3.09E-02 | -1.04E+00 |
| D-Maltose                                | 2.54E-06 | 2.19E-05 | -1.15E+00 |
| Ansamitocin P3                           | 4.49E-04 | 1.29E-03 | -1.16E+00 |
| Indolelactic acid                        | 6.59E-03 | 8.58E-03 | -1.25E+00 |
| Stachyose                                | 9.92E-05 | 4.74E-04 | -1.42E+00 |
| Levan                                    | 7.06E-08 | 1.01E-06 | -1.64E+00 |
| Sinapic acid                             | 2.60E-04 | 8.60E-04 | -1.73E+00 |
| Tetrahydrofolyl-[Glu](2)                 | 1.62E-03 | 3.16E-03 | -1.74E+00 |
| Guanosine                                | 1.54E-02 | 1.66E-02 | -1.89E+00 |
| Cytidine                                 | 3.55E-03 | 5.41E-03 | -1.90E+00 |
| 7,8-Dihydroptericoic acid                | 1.00E-03 | 2.26E-03 | -2.32E+00 |
| 5-Aminoimidazole ribonucleotide          | 2.44E-10 | 1.05E-08 | -4.59E+00 |

**Table S5. The differential metabolites (VIP >1 and P-value <0.05) between FMT-CM and FMT-CF**

| Metabolite                          | P-value  | FDR      | Log2FC    |
|-------------------------------------|----------|----------|-----------|
| Argininosuccinic acid               | 1.06E-05 | 6.80E-04 | 5.58E+00  |
| 12-Deoxynogalonic acid              | 1.26E-03 | 2.48E-02 | 3.71E+00  |
| Biopterin                           | 1.25E-03 | 2.48E-02 | 3.32E+00  |
| PC                                  | 7.70E-03 | 6.12E-02 | 5.00E+00  |
| N-Palmitoylsphingosine              | 7.11E-04 | 1.80E-02 | 2.79E+00  |
| Cotinine glucuronide                | 9.45E-05 | 4.33E-03 | 2.68E+00  |
| Tyramine glucuronide                | 1.33E-02 | 7.76E-02 | 2.66E+00  |
| 1-Pyrroline-4-hydroxy-2-carboxylate | 1.35E-05 | 8.12E-04 | 2.51E+00  |
| Dihydro-3-coumaric acid             | 5.90E-03 | 5.59E-02 | 1.51E+00  |
| D-Glucose                           | 3.90E-02 | 1.36E-01 | 1.18E+00  |
| Dimethylethanolamine                | 1.80E-02 | 8.73E-02 | -9.39E-02 |
| 4-Isopropylbenzoic acid             | 2.07E-02 | 9.40E-02 | -4.09E-01 |

|                                         |          |          |           |
|-----------------------------------------|----------|----------|-----------|
| 3-ketosphinganine                       | 4.82E-02 | 1.57E-01 | -4.18E-01 |
| N-Acetyl-L-glutamic acid                | 1.78E-02 | 8.69E-02 | -4.90E-01 |
| L-Aspartic acid                         | 1.47E-02 | 8.31E-02 | -5.60E-01 |
| Phenylacetaldehyde                      | 4.30E-03 | 4.55E-02 | -1.56E+00 |
| Uridine diphosphate-N-acetylglucosamine | 7.32E-03 | 5.97E-02 | -1.96E+00 |
| UDP-glucose                             | 8.49E-04 | 2.04E-02 | -2.47E+00 |
| Equol                                   | 1.30E-06 | 9.63E-05 | -3.56E+00 |
